# Supplementary material for: π-Conjugation in donor-substituted cyanoethynylethenes: an EDA study
Source: Royal Society of Chemistry journal article supplement (doi:10.1039/b613671k), 2006-01-01
Supplement: b613671k.pdf [file b613671k.pdf]

Electronic Supplementary Information belonging to the manuscript:

## $\pi$ -Conjugation in Donor-Substituted Cyanoethynylethenes: an EDA Study

*Israel Fernández\* and Gernot Frenking\**

Fachbereich Chemie, Philipps-Universität Marburg, Hans-Meerwein Strasse, 35043  
Marburg, Germany.

e-mail: frenking@chemie.uni-marburg.de

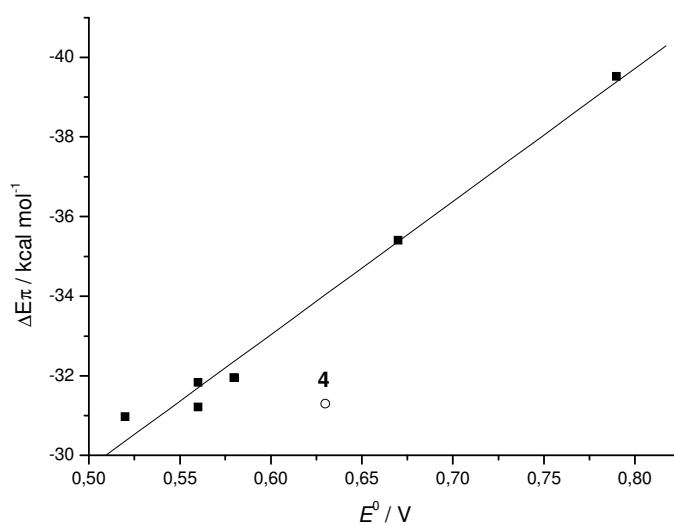

**Figure 1S.** Plot of the  $\Delta E_\pi$  values versus the first oxidation potentials  $E^0$ .

---

\* To whom correspondence should be addressed. Phone: +49(0)6421-282 5563; Fax:  
+49(0)6421-282 5566.

Cartesian coordinates (in Å) and total energies (in a.u.) of all species discussed in the text. All calculations have been performed at the BP86/TZ2P level of theory. See text for computational details.

**1, E = -7.246656**

|   |              |              |              |
|---|--------------|--------------|--------------|
| C | 1.549840000  | 1.713620000  | 0.000000000  |
| C | 0.337210000  | 0.980310000  | 0.000000000  |
| C | -0.879230000 | 1.708870000  | 0.000000000  |
| C | -0.885320000 | 3.087200000  | 0.000000000  |
| C | 0.331200000  | 3.826320000  | 0.000000000  |
| C | 1.550890000  | 3.092280000  | 0.000000000  |
| C | 0.333740000  | -0.416260000 | 0.000000000  |
| C | 0.306680000  | -1.642380000 | 0.000000000  |
| C | 0.275620000  | -3.031850000 | 0.000000000  |
| C | 1.537100000  | -3.708650000 | 0.000000000  |
| N | 2.578370000  | -4.227710000 | 0.000000000  |
| N | 0.328350000  | 5.194210000  | 0.000000000  |
| C | -0.908290000 | -3.777400000 | 0.000000000  |
| C | -0.907490000 | -5.195610000 | 0.000000000  |
| N | -0.924820000 | -6.361210000 | 0.000000000  |
| C | -2.164140000 | -3.115210000 | 0.000000000  |
| N | -3.188980000 | -2.559810000 | 0.000000000  |
| C | -0.931380000 | 5.929230000  | 0.000000000  |
| C | 1.584770000  | 5.934430000  | 0.000000000  |
| H | 2.493690000  | 1.171920000  | 0.000000000  |
| H | -1.820150000 | 1.162150000  | 0.000000000  |
| H | -1.840090000 | 3.606090000  | 0.000000000  |
| H | 2.503270000  | 3.615340000  | 0.000000000  |
| H | -0.718260000 | 7.001250000  | 0.000000000  |
| H | -1.532420000 | 5.698500000  | -0.892690000 |
| H | -1.532420000 | 5.698500000  | 0.892690000  |
| H | 1.367290000  | 7.005570000  | 0.000000000  |
| H | 2.186840000  | 5.706320000  | 0.892750000  |
| H | 2.186840000  | 5.706320000  | -0.892750000 |

**2, E = -7.366271**

|   |              |              |             |
|---|--------------|--------------|-------------|
| C | 1.547470000  | 1.699530000  | 0.000000000 |
| C | 0.336120000  | 0.967560000  | 0.000000000 |
| C | -0.876800000 | 1.698080000  | 0.000000000 |
| C | -0.881250000 | 3.078170000  | 0.000000000 |
| C | 0.334570000  | 3.815610000  | 0.000000000 |
| C | 1.551500000  | 3.079960000  | 0.000000000 |
| C | 0.331640000  | -0.433260000 | 0.000000000 |
| C | 0.305440000  | -1.658020000 | 0.000000000 |
| C | 0.292130000  | -3.054310000 | 0.000000000 |
| C | 1.543230000  | -3.726070000 | 0.000000000 |
| C | 2.616690000  | -4.286720000 | 0.000000000 |
| N | 0.333570000  | 5.186420000  | 0.000000000 |
| C | -0.901060000 | -3.787500000 | 0.000000000 |
| C | -0.900450000 | -5.206380000 | 0.000000000 |
| N | -0.910600000 | -6.372400000 | 0.000000000 |
| C | -2.156810000 | -3.125280000 | 0.000000000 |

|   |              |              |              |
|---|--------------|--------------|--------------|
| N | -3.184390000 | -2.574360000 | 0.000000000  |
| C | -0.924960000 | 5.920700000  | 0.000000000  |
| C | 1.590370000  | 5.922930000  | 0.000000000  |
| H | 2.490990000  | 1.156990000  | 0.000000000  |
| H | -1.818570000 | 1.152860000  | 0.000000000  |
| H | -1.835770000 | 3.597630000  | 0.000000000  |
| H | 2.505200000  | 3.601010000  | 0.000000000  |
| H | 3.556800000  | -4.794050000 | 0.000000000  |
| H | -0.712270000 | 6.993040000  | 0.000000000  |
| H | -1.527470000 | 5.690640000  | -0.892400000 |
| H | -1.527470000 | 5.690640000  | 0.892400000  |
| H | 1.375840000  | 6.994950000  | 0.000000000  |
| H | 2.193540000  | 5.694340000  | 0.892490000  |
| H | 2.193540000  | 5.694340000  | -0.892490000 |

### 3, E = -7.958079

|   |              |              |              |
|---|--------------|--------------|--------------|
| C | 1.160650000  | 2.170910000  | 0.000000000  |
| C | -0.045410000 | 1.430420000  | 0.000000000  |
| C | -1.263890000 | 2.151910000  | 0.000000000  |
| C | -1.278540000 | 3.531770000  | 0.000000000  |
| C | -0.068090000 | 4.278090000  | 0.000000000  |
| C | 1.154280000  | 3.551320000  | 0.000000000  |
| C | -0.042610000 | 0.029450000  | 0.000000000  |
| C | -0.069740000 | -1.195040000 | 0.000000000  |
| C | -0.095960000 | -2.592550000 | 0.000000000  |
| C | 1.141360000  | -3.268700000 | 0.000000000  |
| C | 2.229890000  | -3.827060000 | 0.000000000  |
| N | -0.079320000 | 5.648690000  | 0.000000000  |
| C | -1.301660000 | -3.311840000 | 0.000000000  |
| C | -1.318360000 | -4.729390000 | 0.000000000  |
| N | -1.342270000 | -5.895360000 | 0.000000000  |
| C | -2.546260000 | -2.631770000 | 0.000000000  |
| N | -3.564610000 | -2.063350000 | 0.000000000  |
| C | -1.343250000 | 6.373910000  | 0.000000000  |
| C | 1.171990000  | 6.394720000  | 0.000000000  |
| C | 3.428440000  | -4.453120000 | 0.000000000  |
| C | 4.507390000  | -5.016770000 | 0.000000000  |
| H | 2.108160000  | 1.635470000  | 0.000000000  |
| H | -2.201640000 | 1.599820000  | 0.000000000  |
| H | -2.236880000 | 4.044150000  | 0.000000000  |
| H | 2.104090000  | 4.079380000  | 0.000000000  |
| H | -1.138280000 | 7.447750000  | 0.000000000  |
| H | -1.943990000 | 6.139490000  | -0.892420000 |
| H | -1.943990000 | 6.139490000  | 0.892420000  |
| H | 0.949280000  | 7.465010000  | 0.000000000  |
| H | 1.776710000  | 6.170590000  | 0.892520000  |
| H | 1.776710000  | 6.170590000  | -0.892520000 |
| H | 5.450670000  | -5.517250000 | 0.000000000  |

### 4, E = -11.489572

|   |             |              |              |
|---|-------------|--------------|--------------|
| C | 0.000000000 | -3.407970000 | 1.475940000  |
| C | 0.000000000 | -3.424230000 | 0.062480000  |
| C | 0.000000000 | -4.683670000 | -0.580280000 |
| C | 0.000000000 | -5.859820000 | 0.145320000  |
| C | 0.000000000 | -5.845370000 | 1.565770000  |
| C | 0.000000000 | -4.579250000 | 2.209710000  |
| C | 0.000000000 | -2.231350000 | -0.679770000 |

|   |              |              |              |
|---|--------------|--------------|--------------|
| C | 0.000000000  | -1.199490000 | -1.336450000 |
| C | 0.000000000  | 0.000000000  | -2.064250000 |
| C | 0.000000000  | 1.199490000  | -1.336450000 |
| C | 0.000000000  | 2.231350000  | -0.679770000 |
| N | 0.000000000  | -7.012570000 | 2.290420000  |
| C | 0.000000000  | 0.000000000  | -3.471690000 |
| C | 0.000000000  | -1.215670000 | -4.200210000 |
| N | 0.000000000  | -2.219340000 | -4.795560000 |
| C | 0.000000000  | 1.215670000  | -4.200210000 |
| N | 0.000000000  | 2.219340000  | -4.795560000 |
| C | 0.000000000  | -8.298790000 | 1.608870000  |
| C | 0.000000000  | -6.972450000 | 3.744990000  |
| C | 0.000000000  | 3.424220000  | 0.062480000  |
| C | 0.000000000  | 4.683670000  | -0.580280000 |
| C | 0.000000000  | 3.407970000  | 1.475940000  |
| C | 0.000000000  | 5.859820000  | 0.145320000  |
| C | 0.000000000  | 4.579250000  | 2.209710000  |
| C | 0.000000000  | 5.845370000  | 1.565770000  |
| N | 0.000000000  | 7.012570000  | 2.290420000  |
| C | 0.000000000  | 8.298790000  | 1.608870000  |
| C | 0.000000000  | 6.972450000  | 3.744990000  |
| H | 0.000000000  | -2.449300000 | 1.991450000  |
| H | 0.000000000  | -4.718290000 | -1.668000000 |
| H | 0.000000000  | -6.804570000 | -0.391950000 |
| H | 0.000000000  | -4.517400000 | 3.294840000  |
| H | 0.000000000  | -9.098260000 | 2.354930000  |
| H | -0.892150000 | -8.422350000 | 0.974710000  |
| H | 0.892150000  | -8.422350000 | 0.974710000  |
| H | 0.000000000  | -7.995610000 | 4.130820000  |
| H | 0.892230000  | -6.459040000 | 4.137600000  |
| H | -0.892230000 | -6.459040000 | 4.137600000  |
| H | 0.000000000  | 4.718290000  | -1.668000000 |
| H | 0.000000000  | 2.449300000  | 1.991450000  |
| H | 0.000000000  | 6.804570000  | -0.391950000 |
| H | 0.000000000  | 4.517400000  | 3.294840000  |
| H | 0.000000000  | 9.098260000  | 2.354930000  |
| H | 0.892150000  | 8.422350000  | 0.974710000  |
| H | -0.892150000 | 8.422350000  | 0.974710000  |
| H | 0.000000000  | 7.995610000  | 4.130820000  |
| H | -0.892230000 | 6.459040000  | 4.137600000  |
| H | 0.892230000  | 6.459040000  | 4.137600000  |

**5, E = -14.011915**

|   |              |              |             |
|---|--------------|--------------|-------------|
| C | -5.031920000 | -0.909300000 | 0.000000000 |
| C | -4.514280000 | 0.408250000  | 0.000000000 |
| C | -5.444060000 | 1.475100000  | 0.000000000 |
| C | -6.805640000 | 1.243910000  | 0.000000000 |
| C | -7.324380000 | -0.078590000 | 0.000000000 |
| C | -6.391800000 | -1.150080000 | 0.000000000 |
| C | -3.131310000 | 0.642870000  | 0.000000000 |
| C | -1.922700000 | 0.842850000  | 0.000000000 |
| C | -0.531560000 | 1.004160000  | 0.000000000 |
| C | 0.251230000  | -0.151270000 | 0.000000000 |
| C | 0.909260000  | -1.186060000 | 0.000000000 |
| N | -8.678300000 | -0.312930000 | 0.000000000 |
| C | 0.061130000  | 2.302060000  | 0.000000000 |
| C | -0.734780000 | 3.473710000  | 0.000000000 |
| C | -1.382830000 | 4.498650000  | 0.000000000 |
| C | 1.440280000  | 2.444760000  | 0.000000000 |

|   |               |              |              |
|---|---------------|--------------|--------------|
| C | 2.661420000   | 2.595530000  | 0.000000000  |
| C | -9.615360000  | 0.800950000  | 0.000000000  |
| C | -9.186710000  | -1.676730000 | 0.000000000  |
| C | 4.041520000   | 2.707730000  | 0.000000000  |
| C | 4.745650000   | 3.923510000  | 0.000000000  |
| C | 4.772180000   | 1.476020000  | 0.000000000  |
| C | 4.052800000   | 5.160160000  | 0.000000000  |
| C | 6.162060000   | 3.964260000  | 0.000000000  |
| N | 7.327980000   | 4.009800000  | 0.000000000  |
| C | 1.669120000   | -2.363350000 | 0.000000000  |
| C | 1.053160000   | -3.635680000 | 0.000000000  |
| C | 3.082940000   | -2.328140000 | 0.000000000  |
| C | 1.796760000   | -4.798220000 | 0.000000000  |
| C | 3.831080000   | -3.486430000 | 0.000000000  |
| C | 3.221460000   | -4.773080000 | 0.000000000  |
| N | 3.967270000   | -5.928160000 | 0.000000000  |
| C | 5.423180000   | -5.953200000 | 0.000000000  |
| C | 3.393150000   | -7.264980000 | 0.000000000  |
| N | 3.488580000   | 6.180910000  | 0.000000000  |
| N | 5.326220000   | 0.452580000  | 0.000000000  |
| H | -4.335930000  | -1.746120000 | 0.000000000  |
| H | -5.068700000  | 2.496450000  | 0.000000000  |
| H | -7.480800000  | 2.095790000  | 0.000000000  |
| H | -6.741240000  | -2.179380000 | 0.000000000  |
| H | -1.944110000  | 5.406770000  | 0.000000000  |
| H | -10.636050000 | 0.408620000  | 0.000000000  |
| H | -9.492330000  | 1.434700000  | 0.892370000  |
| H | -9.492330000  | 1.434700000  | -0.892370000 |
| H | -10.279870000 | -1.650070000 | 0.000000000  |
| H | -8.858150000  | -2.232580000 | -0.892390000 |
| H | -8.858150000  | -2.232580000 | 0.892390000  |
| H | -0.033710000  | -3.696510000 | 0.000000000  |
| H | 3.597470000   | -1.369360000 | 0.000000000  |
| H | 1.257970000   | -5.740500000 | 0.000000000  |
| H | 4.910960000   | -3.379580000 | 0.000000000  |
| H | 5.849810000   | -4.951380000 | 0.000000000  |
| H | 5.793550000   | -6.484060000 | 0.891530000  |
| H | 5.793550000   | -6.484060000 | -0.891530000 |
| H | 2.304250000   | -7.242970000 | 0.000000000  |
| H | 3.724800000   | -7.821560000 | -0.891310000 |
| H | 3.724800000   | -7.821560000 | 0.891310000  |

**6, E = -11.486780**

|   |              |              |             |
|---|--------------|--------------|-------------|
| C | 4.849360000  | -2.287070000 | 0.000000000 |
| C | 4.270760000  | -0.997280000 | 0.000000000 |
| C | 5.145300000  | 0.114690000  | 0.000000000 |
| C | 6.517510000  | -0.050490000 | 0.000000000 |
| C | 7.100470000  | -1.345410000 | 0.000000000 |
| C | 6.221030000  | -2.460410000 | 0.000000000 |
| C | 2.877960000  | -0.818260000 | 0.000000000 |
| C | 1.667500000  | -0.634360000 | 0.000000000 |
| C | 0.289020000  | -0.412220000 | 0.000000000 |
| C | -0.568470000 | -1.553310000 | 0.000000000 |
| N | 8.465230000  | -1.513230000 | 0.000000000 |
| C | -0.291780000 | 0.867250000  | 0.000000000 |
| C | -1.668770000 | 1.096200000  | 0.000000000 |
| C | -2.875960000 | 1.301560000  | 0.000000000 |
| C | 0.567160000  | 2.007670000  | 0.000000000 |
| N | 1.258470000  | 2.945660000  | 0.000000000 |

|   |               |              |              |
|---|---------------|--------------|--------------|
| C | 9.345980000   | -0.355000000 | 0.000000000  |
| C | 9.038730000   | -2.850190000 | 0.000000000  |
| C | -4.262590000  | 1.518350000  | 0.000000000  |
| C | -5.173750000  | 0.437870000  | 0.000000000  |
| C | -4.803540000  | 2.824930000  | 0.000000000  |
| C | -6.539790000  | 0.649250000  | 0.000000000  |
| C | -6.167580000  | 3.043020000  | 0.000000000  |
| C | -7.088330000  | 1.961130000  | 0.000000000  |
| N | -8.453280000  | 2.140320000  | 0.000000000  |
| C | -9.343210000  | 0.987870000  | 0.000000000  |
| C | -9.103980000  | 3.440370000  | 0.000000000  |
| N | -1.259480000  | -2.491540000 | 0.000000000  |
| H | 4.196170000   | -3.157630000 | 0.000000000  |
| H | 4.721480000   | 1.117130000  | 0.000000000  |
| H | 7.149320000   | 0.834000000  | 0.000000000  |
| H | 6.619710000   | -3.471500000 | 0.000000000  |
| H | 10.384980000  | -0.696180000 | 0.000000000  |
| H | 9.192210000   | 0.273040000  | -0.892060000 |
| H | 9.192210000   | 0.273040000  | 0.892060000  |
| H | 10.129440000  | -2.771410000 | 0.000000000  |
| H | 8.737230000   | -3.422270000 | 0.892120000  |
| H | 8.737230000   | -3.422270000 | -0.892120000 |
| H | -4.785880000  | -0.579020000 | 0.000000000  |
| H | -4.124700000  | 3.675700000  | 0.000000000  |
| H | -7.196380000  | -0.216480000 | 0.000000000  |
| H | -6.516890000  | 4.071680000  | 0.000000000  |
| H | -10.378170000 | 1.344040000  | 0.000000000  |
| H | -9.197790000  | 0.360010000  | -0.892990000 |
| H | -9.197790000  | 0.360010000  | 0.892990000  |
| H | -8.373800000  | 4.249920000  | 0.000000000  |
| H | -9.738440000  | 3.558540000  | -0.892750000 |
| H | -9.738440000  | 3.558540000  | 0.892750000  |

**(E)-7, E = -7.482135**

|   |              |              |             |
|---|--------------|--------------|-------------|
| C | 1.538900000  | 1.676900000  | 0.000000000 |
| C | 0.327300000  | 0.948200000  | 0.000000000 |
| C | -0.881800000 | 1.681800000  | 0.000000000 |
| C | -0.882400000 | 3.063500000  | 0.000000000 |
| C | 0.334000000  | 3.797100000  | 0.000000000 |
| C | 1.547300000  | 3.059100000  | 0.000000000 |
| C | 0.320200000  | -0.456200000 | 0.000000000 |
| C | 0.292900000  | -1.679700000 | 0.000000000 |
| C | 0.287800000  | -3.080200000 | 0.000000000 |
| C | 1.548900000  | -3.735500000 | 0.000000000 |
| C | 2.639900000  | -4.263100000 | 0.000000000 |
| N | 0.335200000  | 5.170500000  | 0.000000000 |
| C | -0.896400000 | -3.824500000 | 0.000000000 |
| C | -0.915400000 | -5.236500000 | 0.000000000 |
| C | -0.957500000 | -6.449300000 | 0.000000000 |
| C | -2.150600000 | -3.149400000 | 0.000000000 |
| N | -3.181700000 | -2.604800000 | 0.000000000 |
| H | -1.825500000 | 1.139700000  | 0.000000000 |
| H | -1.835700000 | 3.585400000  | 0.000000000 |
| H | 2.502700000  | 3.577500000  | 0.000000000 |
| H | 2.480900000  | 1.131800000  | 0.000000000 |
| C | -0.917900000 | 5.904500000  | 0.000000000 |
| C | 1.586100000  | 5.909700000  | 0.000000000 |
| H | 3.597000000  | -4.736600000 | 0.000000000 |
| H | -0.985900000 | -7.516600000 | 0.000000000 |

|   |              |             |              |
|---|--------------|-------------|--------------|
| H | 1.369400000  | 6.984100000 | 0.000000000  |
| H | 2.194500000  | 5.683500000 | 0.893500000  |
| H | 2.194500000  | 5.683500000 | -0.893500000 |
| H | -0.704400000 | 6.979200000 | 0.000000000  |
| H | -1.524900000 | 5.676000000 | -0.893200000 |
| H | -1.524900000 | 5.676000000 | 0.893200000  |

**(Z)-7, E = -7.481372**

|   |              |              |              |
|---|--------------|--------------|--------------|
| C | 1.036380000  | 2.027320000  | 0.000000000  |
| C | 0.048310000  | 1.016020000  | 0.000000000  |
| C | -1.305190000 | 1.424740000  | 0.000000000  |
| C | -1.655010000 | 2.761820000  | 0.000000000  |
| C | -0.663050000 | 3.778440000  | 0.000000000  |
| C | 0.696530000  | 3.367360000  | 0.000000000  |
| C | 0.395530000  | -0.346090000 | 0.000000000  |
| C | 0.683040000  | -1.535800000 | 0.000000000  |
| C | 1.051250000  | -2.888390000 | 0.000000000  |
| C | 2.439590000  | -3.189680000 | 0.000000000  |
| C | 3.625730000  | -3.436510000 | 0.000000000  |
| N | -1.006360000 | 5.108920000  | 0.000000000  |
| C | 0.104470000  | -3.917140000 | 0.000000000  |
| C | -1.286490000 | -3.669830000 | 0.000000000  |
| C | -2.486020000 | -3.487150000 | 0.000000000  |
| C | 0.522590000  | -5.278770000 | 0.000000000  |
| N | 0.838260000  | -6.400860000 | 0.000000000  |
| H | -2.082810000 | 0.663530000  | 0.000000000  |
| H | -2.709110000 | 3.026730000  | 0.000000000  |
| H | 1.491570000  | 4.108450000  | 0.000000000  |
| H | 2.085580000  | 1.737880000  | 0.000000000  |
| C | -2.406960000 | 5.504480000  | 0.000000000  |
| C | 0.027580000  | 6.133190000  | 0.000000000  |
| H | -3.541320000 | -3.326140000 | 0.000000000  |
| H | 4.667350000  | -3.671730000 | 0.000000000  |
| H | -0.445940000 | 7.118840000  | 0.000000000  |
| H | 0.669810000  | 6.062430000  | 0.892260000  |
| H | 0.669810000  | 6.062430000  | -0.892260000 |
| H | -2.470090000 | 6.596130000  | 0.000000000  |
| H | -2.934680000 | 5.131550000  | -0.892240000 |
| H | -2.934680000 | 5.131550000  | 0.892240000  |

**8, E = -7.480958**

|   |              |              |             |
|---|--------------|--------------|-------------|
| C | 1.671890000  | 1.531610000  | 0.000000000 |
| C | 0.391850000  | 0.931460000  | 0.000000000 |
| C | -0.732880000 | 1.787910000  | 0.000000000 |
| C | -0.591550000 | 3.162740000  | 0.000000000 |
| C | 0.693830000  | 3.766550000  | 0.000000000 |
| C | 1.823150000  | 2.906000000  | 0.000000000 |
| C | 0.239510000  | -0.465760000 | 0.000000000 |
| C | 0.090000000  | -1.680320000 | 0.000000000 |
| C | -0.048800000 | -3.072920000 | 0.000000000 |
| C | 1.158380000  | -3.840050000 | 0.000000000 |
| N | 2.158250000  | -4.437150000 | 0.000000000 |
| N | 0.836460000  | 5.133120000  | 0.000000000 |
| C | -1.281090000 | -3.731160000 | 0.000000000 |
| C | -2.494410000 | -3.000710000 | 0.000000000 |
| C | -3.550520000 | -2.403560000 | 0.000000000 |
| C | -1.366570000 | -5.143800000 | 0.000000000 |

|   |              |              |              |
|---|--------------|--------------|--------------|
| C | -1.463860000 | -6.352840000 | 0.000000000  |
| H | -1.728300000 | 1.348070000  | 0.000000000  |
| H | -1.485640000 | 3.780730000  | 0.000000000  |
| H | 2.827290000  | 3.322020000  | 0.000000000  |
| H | 2.552620000  | 0.892260000  | 0.000000000  |
| C | -0.333920000 | 5.991480000  | 0.000000000  |
| C | 2.156220000  | 5.740640000  | 0.000000000  |
| H | -4.479550000 | -1.877470000 | 0.000000000  |
| H | -1.534080000 | -7.418290000 | 0.000000000  |
| H | -0.011600000 | 7.038790000  | 0.000000000  |
| H | -0.961710000 | 5.827010000  | -0.893290000 |
| H | -0.961710000 | 5.827010000  | 0.893290000  |
| H | 2.050790000  | 6.831940000  | 0.000000000  |
| H | 2.738690000  | 5.453550000  | 0.893560000  |
| H | 2.738690000  | 5.453550000  | -0.893560000 |

**9a, E = -10.660920**

|   |              |              |              |
|---|--------------|--------------|--------------|
| C | 0.373320000  | 5.451430000  | 0.000000000  |
| C | -0.618180000 | 4.443070000  | 0.000000000  |
| C | -1.970060000 | 4.857520000  | 0.000000000  |
| C | -2.314670000 | 6.196210000  | 0.000000000  |
| C | -1.319080000 | 7.209100000  | 0.000000000  |
| C | 0.038710000  | 6.792750000  | 0.000000000  |
| C | -0.271930000 | 3.081100000  | 0.000000000  |
| C | 0.023500000  | 1.892600000  | 0.000000000  |
| C | 0.409760000  | 0.546360000  | 0.000000000  |
| C | 1.803460000  | 0.272960000  | 0.000000000  |
| C | 2.999840000  | 0.074850000  | 0.000000000  |
| N | -1.656880000 | 8.541450000  | 0.000000000  |
| C | -0.523550000 | -0.503450000 | 0.000000000  |
| C | -1.916980000 | -0.238350000 | 0.000000000  |
| C | -3.114120000 | -0.041880000 | 0.000000000  |
| C | -0.117380000 | -1.848190000 | 0.000000000  |
| C | 0.200250000  | -3.028950000 | 0.000000000  |
| C | -3.055490000 | 8.943040000  | 0.000000000  |
| C | -0.618450000 | 9.560870000  | 0.000000000  |
| C | 0.581990000  | -4.385090000 | 0.000000000  |
| C | -0.393780000 | -5.410510000 | 0.000000000  |
| C | 1.950290000  | -4.747730000 | 0.000000000  |
| C | -0.017790000 | -6.744260000 | 0.000000000  |
| C | 2.328640000  | -6.080360000 | 0.000000000  |
| C | 1.340910000  | -7.068240000 | 0.000000000  |
| N | 1.741840000  | -8.481970000 | 0.000000000  |
| O | 0.843890000  | -9.336250000 | 0.000000000  |
| O | 2.954900000  | -8.736850000 | 0.000000000  |
| H | 1.421350000  | 5.157850000  | 0.000000000  |
| H | -2.750900000 | 4.099540000  | 0.000000000  |
| H | -3.367790000 | 6.465230000  | 0.000000000  |
| H | 0.836760000  | 7.530650000  | 0.000000000  |
| H | 4.052180000  | -0.104990000 | 0.000000000  |
| H | -4.166900000 | 0.134400000  | 0.000000000  |
| H | -3.113900000 | 10.034980000 | 0.000000000  |
| H | -3.584990000 | 8.572440000  | -0.892240000 |
| H | -3.584990000 | 8.572440000  | 0.892240000  |
| H | -1.087330000 | 10.548740000 | 0.000000000  |
| H | 0.023640000  | 9.487210000  | 0.892210000  |
| H | 0.023640000  | 9.487210000  | -0.892210000 |
| H | -1.446720000 | -5.136750000 | 0.000000000  |



|   |              |              |             |
|---|--------------|--------------|-------------|
| H | 2.702830000  | -3.962380000 | 0.000000000 |
| H | -0.753480000 | -7.544040000 | 0.000000000 |
| H | 3.374200000  | -6.376680000 | 0.000000000 |

**9b, E = -10.660063**

|   |              |              |              |
|---|--------------|--------------|--------------|
| C | 4.353400000  | -0.414120000 | 0.000000000  |
| C | 2.941150000  | -0.340010000 | 0.000000000  |
| C | 2.357650000  | 0.947370000  | 0.000000000  |
| C | 3.129640000  | 2.093320000  | 0.000000000  |
| C | 4.547820000  | 2.019000000  | 0.000000000  |
| C | 5.135620000  | 0.725870000  | 0.000000000  |
| C | 2.146530000  | -1.499080000 | 0.000000000  |
| C | 1.443230000  | -2.501330000 | 0.000000000  |
| C | 0.685810000  | -3.679790000 | 0.000000000  |
| C | 1.398470000  | -4.907560000 | 0.000000000  |
| C | 2.030220000  | -5.942680000 | 0.000000000  |
| N | 5.319940000  | 3.155410000  | 0.000000000  |
| C | -0.719040000 | -3.673040000 | 0.000000000  |
| C | -1.446050000 | -2.470850000 | 0.000000000  |
| C | -2.118410000 | -1.449750000 | 0.000000000  |
| C | -1.457960000 | -4.883540000 | 0.000000000  |
| C | 4.690790000  | 4.467840000  | 0.000000000  |
| C | 6.771680000  | 3.055720000  | 0.000000000  |
| C | -2.116440000 | -5.902470000 | 0.000000000  |
| C | -2.893870000 | -0.273660000 | 0.000000000  |
| C | -4.307860000 | -0.342580000 | 0.000000000  |
| C | -2.276760000 | 0.999800000  | 0.000000000  |
| C | -5.072240000 | 0.813210000  | 0.000000000  |
| C | -3.037840000 | 2.157060000  | 0.000000000  |
| C | -4.430810000 | 2.054140000  | 0.000000000  |
| N | -5.239470000 | 3.280950000  | 0.000000000  |
| O | -6.472570000 | 3.158750000  | 0.000000000  |
| O | -4.639890000 | 4.366230000  | 0.000000000  |
| H | 4.828500000  | -1.393360000 | 0.000000000  |
| H | 1.273130000  | 1.029940000  | 0.000000000  |
| H | 2.632550000  | 3.059820000  | 0.000000000  |
| H | 6.217180000  | 0.617560000  | 0.000000000  |
| H | 2.576470000  | -6.860000000 | 0.000000000  |
| H | 5.467870000  | 5.237070000  | 0.000000000  |
| H | 4.062080000  | 4.616990000  | -0.892270000 |
| H | 4.062080000  | 4.616990000  | 0.892270000  |
| H | 7.198840000  | 4.062300000  | 0.000000000  |
| H | 7.142690000  | 2.526730000  | 0.892300000  |
| H | 7.142690000  | 2.526730000  | -0.892300000 |
| H | -2.684820000 | -6.806090000 | 0.000000000  |
| H | -4.788040000 | -1.318720000 | 0.000000000  |
| H | -1.191120000 | 1.056830000  | 0.000000000  |
| H | -6.158460000 | 0.778070000  | 0.000000000  |
| H | -2.579960000 | 3.142550000  | 0.000000000  |

**10, E = -10.659548**

|   |              |             |             |
|---|--------------|-------------|-------------|
| C | -0.230790000 | 3.699910000 | 0.000000000 |
| C | -1.510400000 | 3.100730000 | 0.000000000 |
| C | -2.632090000 | 3.959950000 | 0.000000000 |
| C | -2.488430000 | 5.335590000 | 0.000000000 |
| C | -1.202880000 | 5.937950000 | 0.000000000 |
| C | -0.076180000 | 5.074400000 | 0.000000000 |

|   |              |              |              |
|---|--------------|--------------|--------------|
| C | -1.661950000 | 1.701030000  | 0.000000000  |
| C | -1.802840000 | 0.486110000  | 0.000000000  |
| C | -1.920330000 | -0.914510000 | 0.000000000  |
| C | -0.723850000 | -1.664220000 | 0.000000000  |
| C | 0.326360000  | -2.285790000 | 0.000000000  |
| N | -1.054630000 | 7.305360000  | 0.000000000  |
| C | -3.165030000 | -1.561560000 | 0.000000000  |
| C | -4.373230000 | -0.825280000 | 0.000000000  |
| C | -5.427610000 | -0.223590000 | 0.000000000  |
| C | -3.265440000 | -2.973290000 | 0.000000000  |
| C | -3.393000000 | -4.180670000 | 0.000000000  |
| C | -2.225270000 | 8.168760000  | 0.000000000  |
| C | 0.274040000  | 7.897500000  | 0.000000000  |
| C | 1.534590000  | -3.015990000 | 0.000000000  |
| C | 1.519740000  | -4.429800000 | 0.000000000  |
| C | 2.779590000  | -2.346050000 | 0.000000000  |
| C | 2.705200000  | -5.148430000 | 0.000000000  |
| C | 3.966950000  | -3.061700000 | 0.000000000  |
| C | 3.917760000  | -4.456670000 | 0.000000000  |
| N | 5.178210000  | -5.218430000 | 0.000000000  |
| O | 5.102770000  | -6.454390000 | 0.000000000  |
| O | 6.237470000  | -4.576940000 | 0.000000000  |
| H | 0.649740000  | 3.060090000  | 0.000000000  |
| H | -3.628450000 | 3.522220000  | 0.000000000  |
| H | -3.381990000 | 5.954510000  | 0.000000000  |
| H | 0.929270000  | 5.487290000  | 0.000000000  |
| h | -6.353830000 | 0.307060000  | 0.000000000  |
| H | -3.502270000 | -5.242590000 | 0.000000000  |
| H | -1.899640000 | 9.212720000  | 0.000000000  |
| H | -2.851210000 | 8.006200000  | -0.892170000 |
| H | -2.851210000 | 8.006200000  | 0.892170000  |
| H | 0.180070000  | 8.987010000  | 0.000000000  |
| H | 0.850490000  | 7.604340000  | 0.892140000  |
| H | 0.850490000  | 7.604340000  | -0.892140000 |
| H | 0.562640000  | -4.946450000 | 0.000000000  |
| H | 2.793570000  | -1.258310000 | 0.000000000  |
| H | 2.713990000  | -6.235070000 | 0.000000000  |
| H | 4.933280000  | -2.564630000 | 0.000000000  |
